# Supplementary material for: Pharmacogenetic Variants Associated with Fluoxetine Pharmacokinetics from a Bioequivalence Study in Healthy Subjects
Source: MDPI journal article supplement (doi:10.3390/jpm13091352), 2023-09-01
Supplement: s1 [file s1]

# Supplemental Information:

Table S1. Individual fluoxetine PK parameters.

| Sub-<br>ject   | Seque-<br>nce | Test product     |                    |                    |                  |                  |         |                 |       | Reference product |                    |                    |                  |                  |         |                 |        |
|----------------|---------------|------------------|--------------------|--------------------|------------------|------------------|---------|-----------------|-------|-------------------|--------------------|--------------------|------------------|------------------|---------|-----------------|--------|
|                |               | C <sub>max</sub> | AUC <sub>0-t</sub> | AUC <sub>0-∞</sub> | t <sub>max</sub> | t <sub>1/2</sub> | Vd      | K <sub>el</sub> | CI    | C <sub>max</sub>  | AUC <sub>0-t</sub> | AUC <sub>0-∞</sub> | t <sub>max</sub> | t <sub>1/2</sub> | Vd      | K <sub>el</sub> | CI     |
| 1              | 1             | 21.77            | 665.36             | 944.61             | 6.00             | 37.24            | 1137.47 | 0.02            | 21.17 | 19.24             | 678.45             | 915.85             | 3.00             | 35.89            | 1130.71 | 0.02            | 21.84  |
| 2              | 2             | 13.83            | 295.70             | 344.96             | 3.00             | 26.45            | 2212.10 | 0.03            | 57.98 | 10.85             | 274.78             | 316.33             | 3.00             | 24.91            | 2272.49 | 0.03            | 63.23  |
| 3              | 2             | 17.58            | 656.51             | 882.20             | 5.00             | 36.45            | 1192.09 | 0.02            | 22.67 | 20.99             | 628.97             | 809.15             | 5.00             | 32.38            | 1154.66 | 0.02            | 24.72  |
| 4              | 1             | 9.60             | 268.31             | 361.57             | 5.00             | 35.35            | 2820.70 | 0.02            | 55.31 | 7.68              | 230.55             | 329.15             | 6.00             | 44.26            | 3880.10 | 0.02            | 60.76  |
| 5              | 2             | 14.54            | 370.91             | 429.55             | 4.00             | 24.79            | 1665.08 | 0.03            | 46.56 | 18.03             | 396.11             | 457.89             | 2.00             | 27.19            | 1713.46 | 0.03            | 43.68  |
| 7              | 1             | 18.02            | 461.90             | 562.35             | 5.00             | 29.39            | 1507.97 | 0.02            | 35.57 | 16.44             | 389.05             | 449.17             | 5.00             | 25.29            | 1624.38 | 0.03            | 44.53  |
| 8              | 2             | 14.46            | 385.01             | 475.17             | 6.00             | 31.39            | 1905.91 | 0.02            | 42.09 | 15.68             | 345.59             | 437.44             | 4.00             | 34.23            | 2257.83 | 0.02            | 45.72  |
| 9              | 1             | 8.92             | 217.37             | 265.38             | 4.00             | 30.42            | 3307.49 | 0.02            | 75.36 | 8.63              | 210.89             | 255.81             | 6.00             | 30.14            | 3399.63 | 0.02            | 78.18  |
| 10             | 2             | 15.84            | 371.93             | 506.00             | 5.00             | 40.32            | 2299.01 | 0.02            | 39.53 | 12.85             | 345.33             | 470.59             | 5.00             | 39.05            | 2394.62 | 0.02            | 42.50  |
| 11             | 1             | 12.14            | 171.86             | 200.73             | 3.00             | 15.42            | 2216.11 | 0.04            | 99.64 | 7.42              | 157.33             | 171.14             | 4.00             | 19.25            | 3246.42 | 0.04            | 116.87 |
| 12             | 2             | 13.24            | 269.72             | 304.14             | 3.00             | 24.32            | 2307.71 | 0.03            | 65.76 | 14.23             | 239.53             | 310.17             | 4.00             | 22.37            | 2080.95 | 0.03            | 64.48  |
| 13             | 1             | 20.25            | 401.55             | 485.71             | 3.00             | 26.91            | 1598.54 | 0.03            | 41.18 | 17.03             | 440.02             | 538.13             | 3.00             | 30.46            | 1632.96 | 0.02            | 37.17  |
| 14             | 2             | 15.37            | 296.70             | 370.13             | 5.00             | 19.93            | 1553.58 | 0.03            | 54.04 | 11.81             | 168.42             | 341.88             | 5.00             | 22.76            | 1921.08 | 0.03            | 58.50  |
| 15             | 2             | 15.13            | 322.48             | 383.78             | 3.00             | 28.03            | 2107.47 | 0.02            | 52.11 | 15.79             | 301.81             | 335.49             | 2.00             | 23.03            | 1980.33 | 0.03            | 59.61  |
| 16             | 1             | 15.25            | 330.89             | 377.82             | 5.00             | 24.99            | 1908.07 | 0.03            | 52.93 | 16.05             | 338.47             | 386.55             | 5.00             | 24.58            | 1834.77 | 0.03            | 51.74  |
| 17             | 2             | 18.90            | 396.98             | 458.70             | 5.00             | 25.80            | 1623.06 | 0.03            | 43.60 | 16.69             | 353.78             | 403.83             | 5.00             | 24.87            | 1776.95 | 0.03            | 49.53  |
| 18             | 1             | 18.76            | 577.69             | 686.16             | 5.00             | 27.17            | 1142.58 | 0.03            | 29.15 | 22.77             | 624.48             | 762.94             | 6.00             | 28.19            | 1066.01 | 0.02            | 26.21  |
| 19             | 2             | 18.24            | 572.51             | 755.65             | 4.00             | 35.36            | 1350.17 | 0.02            | 26.47 | 23.17             | 583.59             | 699.92             | 3.00             | 28.05            | 1156.22 | 0.02            | 28.57  |
| 20             | 1             | 16.30            | 422.68             | 501.94             | 6.00             | 25.80            | 1482.84 | 0.03            | 39.85 | 16.15             | 377.00             | 466.07             | 5.00             | 33.07            | 2047.32 | 0.02            | 42.91  |
| 22             | 1             | 12.03            | 276.39             | 310.08             | 5.00             | 21.85            | 2032.89 | 0.03            | 64.50 | 13.21             | 304.94             | 345.39             | 5.00             | 22.54            | 1883.10 | 0.03            | 57.91  |
| 23             | 1             | 32.05            | 640.75             | 716.66             | 2.00             | 23.10            | 930.04  | 0.03            | 27.91 | 23.71             | 621.29             | 741.34             | 5.00             | 28.02            | 1090.50 | 0.02            | 26.98  |
| 24             | 2             | 12.80            | 345.82             | 445.73             | 6.00             | 34.77            | 2250.53 | 0.02            | 44.87 | 20.05             | 390.12             | 448.28             | 3.00             | 25.09            | 1614.66 | 0.03            | 44.61  |
| 25             | 1             | 24.13            | 957.96             | 2351.79            | 5.00             | 88.86            | 1090.16 | 0.01            | 8.50  | 22.73             | 930.62             | 2383.39            | 4.00             | 106.88           | 1293.86 | 0.01            | 8.39   |
| 26             | 2             | 10.79            | 202.34             | 224.70             | 3.00             | 23.03            | 2957.14 | 0.03            | 89.01 | 10.79             | 225.33             | 242.51             | 4.00             | 19.24            | 2289.59 | 0.04            | 82.47  |
| Mean           |               | 16.25            | 411.64             | 556.06             | 4.42             | 30.71            | 1858.28 | 0.03            | 47.32 | 15.92             | 398.19             | 542.43             | 4.25             | 31.32            | 1947.61 | 0.03            | 49.21  |
| Geometric mean |               | 15.59            | 377.86             | 473.26             | 4.25             | 28.90            | 1761.90 | 0.02            | 42.26 | 15.12             | 360.06             | 457.47             | 4.07             | 29.02            | 1830.29 | 0.02            | 43.72  |

|                                  |       |        |         |       |       |         |       |       |       |        |         |       |        |         |       |        |
|----------------------------------|-------|--------|---------|-------|-------|---------|-------|-------|-------|--------|---------|-------|--------|---------|-------|--------|
| Standard deviation (S.D.)        | 5.02  | 184.05 | 429.46  | 1.18  | 13.78 | 619.84  | 0.01  | 21.32 | 4.89  | 189.55 | 436.65  | 1.19  | 17.21  | 732.91  | 0.01  | 22.98  |
| Standard error of the mean (SEM) | 1.02  | 37.57  | 87.66   | 0.24  | 2.81  | 126.52  | 0.00  | 4.35  | 1.00  | 38.69  | 89.13   | 0.24  | 3.51   | 149.61  | 0.00  | 4.69   |
| Minimum                          | 8.92  | 171.86 | 200.73  | 2.00  | 15.42 | 930.04  | 0.01  | 8.50  | 7.42  | 157.33 | 171.14  | 2.00  | 19.24  | 1066.01 | 0.01  | 8.39   |
| Median                           | 15.31 | 371.42 | 452.21  | 5.00  | 27.04 | 1785.49 | 0.03  | 44.24 | 16.10 | 349.68 | 442.86  | 4.50  | 27.60  | 1858.93 | 0.03  | 45.17  |
| Maximum                          | 32.05 | 957.96 | 2351.79 | 6.00  | 88.86 | 3307.49 | 0.04  | 99.64 | 23.71 | 930.62 | 2383.39 | 6.00  | 106.88 | 3880.10 | 0.04  | 116.87 |
| Coefficient of variation (%)     | 30.90 | 44.70  | 77.20   | 26.60 | 44.90 | 33.40   | 28.30 | 45.10 | 30.70 | 47.60  | 80.50   | 28.00 | 55.00  | 37.60   | 26.10 | 46.70  |

Subjects IDs 6 and 21 dropped out from the bioequivalence trial.

**Table S2.** SNVs and demographic characteristics as predictor variables of PK parameters.

| Models excluding demographic characteristics |                             |             |                |                     | Models including demographic characteristics |                             |             |                |                     |
|----------------------------------------------|-----------------------------|-------------|----------------|---------------------|----------------------------------------------|-----------------------------|-------------|----------------|---------------------|
| Dependent variable                           | Predictor variables         | Coefficient | R <sup>2</sup> | Adj. R <sup>2</sup> | Dependent variable                           | Predictor variables         | Coefficient | R <sup>2</sup> | Adj. R <sup>2</sup> |
| AUC <sub>0-t</sub><br>(h*ng/mL)              | Constant                    | -384.909    | 0.984          | 0.977               | AUC <sub>0-t</sub><br>(h*ng/mL)              | Constant                    | 1407.983    | 0.984          | 0.978               |
|                                              | <i>ABCB1</i> (rs1128503)    | -6.563      |                |                     |                                              | <i>ABCB1</i> (rs1045642)    | -35.575     |                |                     |
|                                              | <i>CYP1A2</i> (rs2470890)   | -33.751     |                |                     |                                              | <i>ABCB1</i> (rs1128503)    | -5.932      |                |                     |
|                                              | <i>CYP1A2</i> (rs762551)    | -18.890     |                |                     |                                              | <i>CYP1A2</i> (rs2069514)   | -36.506     |                |                     |
|                                              | <i>CYP2C19</i> (rs4244285)  | 12.884      |                |                     |                                              | <i>CYP1A2</i> (rs2470890)   | -22.919     |                |                     |
|                                              | <i>CYP2C9</i> (rs1799853)   | 26.770      |                |                     |                                              | <i>CYP2B6</i> (rs2279342)   | -64.374     |                |                     |
|                                              | <i>CYP2C9</i> (rs28371686)  | 74.827      |                |                     |                                              | <i>CYP2C19</i> (rs4917623)  | 29.571      |                |                     |
|                                              | <i>CYP2D6</i> (rs1065852)   | -55.760     |                |                     |                                              | <i>CYP2C9</i> (rs1799853)   | -12.555     |                |                     |
|                                              | <i>CYP2D6</i> (rs1135840)   | 23.740      |                |                     |                                              | <i>CYP2D6</i> (rs1135840)   | 15.952      |                |                     |
|                                              | <i>CYP2D6</i> (rs28371703)  | 137.454     |                |                     |                                              | <i>CYP2D6</i> (rs28371703)  | 78.419      |                |                     |
|                                              | <i>CYP2D6</i> (rs28371706)  | -118.191    |                |                     |                                              | <i>CYP3A4</i> (rs2687116)   | -7.826      |                |                     |
|                                              | <i>CYP2D6</i> (rs72549358)  | 115.010     |                |                     |                                              | <i>CYP3A5</i> (rs776746)    | -53.635     |                |                     |
|                                              | <i>CYP3A4</i> (rs2740574)   | -126.951    |                |                     |                                              | Gender                      | -131.696    |                |                     |
|                                              | <i>CYP3A4</i> (rs3735451)   | -29.337     |                |                     |                                              | Height (m)                  | -257.222    |                |                     |
|                                              | <i>SLC6A4</i> (rs1042173)   | 13.325      |                |                     |                                              | <i>TPH1</i> (rs1799913)     | -20.761     |                |                     |
|                                              | <i>SLC6A4</i> (rs2066713)   | 16.080      |                |                     |                                              |                             |             |                |                     |
| Cl<br>(L/h)                                  | Constant                    | 567.486     | 0.980          | 0.969               | Cl<br>(L/h)                                  | Constant                    | 103.181     | 0.955          | 0.940               |
|                                              | <i>ABCB1</i> (rs2032582)    | -1.280      |                |                     |                                              | <i>CYP1A2</i> (rs2470890)   | 3.452       |                |                     |
|                                              | <i>CYP1A2</i> (rs2470890)   | 5.436       |                |                     |                                              | <i>CYP2C19</i> (rs11188072) | 3.238       |                |                     |
|                                              | <i>CYP2B6</i> (rs2279344)   | -5.530      |                |                     |                                              | <i>CYP2C9</i> (rs28371686)  | -3.142      |                |                     |
|                                              | <i>CYP2B6</i> (rs4803418)   | 1.582       |                |                     |                                              | <i>CYP2D6</i> (rs1065852)   | 6.809       |                |                     |
|                                              | <i>CYP2C19</i> (rs11188072) | 2.272       |                |                     |                                              | <i>CYP2D6</i> (rs16947)     | -6.315      |                |                     |
|                                              | <i>CYP2C19</i> (rs12769205) | 5.584       |                |                     |                                              | <i>CYP2D6</i> (rs28371703)  | -19.606     |                |                     |
|                                              | <i>CYP2C19</i> (rs4917623)  | 1.555       |                |                     |                                              | <i>CYP2D6</i> (rs28371706)  | 19.316      |                |                     |
|                                              | <i>CYP2C9</i> (rs1799853)   | -4.696      |                |                     |                                              | <i>CYP3A4</i> (rs2242480)   | -3.734      |                |                     |
|                                              | <i>CYP2C9</i> (rs2256871)   | 4.406       |                |                     |                                              | <i>CYP3A5</i> (rs776746)    | 6.012       |                |                     |

|                         |                            |         |       |       |                           |        |
|-------------------------|----------------------------|---------|-------|-------|---------------------------|--------|
|                         | <i>CYP2C9</i> (rs28371686) | -9.384  |       |       | <i>Age</i> (Years)        | -0.520 |
|                         | <i>CYP2D6</i> (rs16947)    | -3.932  |       |       | <i>Gender</i>             | 20.301 |
|                         | <i>CYP2D6</i> (rs28371703) | -19.079 |       |       | <i>SLC6A4</i> (rs1042173) | -2.145 |
|                         | <i>CYP2D6</i> (rs28371706) | 26.620  |       |       |                           |        |
|                         | <i>CYP3A4</i> (rs67666821) | -45.090 |       |       |                           |        |
|                         | <i>SLC6A4</i> (rs1042173)  | -5.815  |       |       |                           |        |
|                         | <i>SLC6A4</i> (rs2066713)  | -1.428  |       |       |                           |        |
| t <sub>1/2</sub><br>(h) | Constant                   | -1.100  | 0.935 | 0.924 |                           |        |
|                         | <i>CYP2B6</i> (rs35303484) | 3.229   |       |       |                           |        |
|                         | <i>CYP2C9</i> (rs2256871)  | 10.096  |       |       |                           |        |
|                         | <i>CYP2D6</i> (rs1065852)  | -13.304 |       |       |                           |        |
|                         | <i>CYP2D6</i> (rs28371703) | 15.256  |       |       |                           |        |
|                         | <i>CYP2D6</i> (rs28371706) | -13.635 |       |       |                           |        |
|                         | <i>CYP3A4</i> (rs2740574)  | 9.739   |       |       |                           |        |
|                         | <i>TPH1</i> (rs1799913)    | -0.696  |       |       |                           |        |
|                         |                            |         |       |       |                           |        |

Only significant models are shown ( $p < 0.000$ ) with significant predictor variables ( $p < 0.05$ )
